# Supplementary material for: Ultra-Widefield Retinal Imaging Versus Dilated Fundus Examination for the Detection of Sickle Cell Retinopathy: A Systematic Review and Meta-Analysis
Source: Research Square preprint supplement (doi:10.21203/rs.3.rs-7775346/v1), 2025-10-16
Supplement: Supplementary file 1 [file b0de9ca55951d4ba97edc5d7.docx]

**1. PubMed**

("sickle cell anemia"[MeSH] OR "sickle cell"[tiab] OR "sickle cell disease"[tiab])
AND ("retinopathy"[MeSH] OR "retinopathy"[tiab] OR "retinal diseases"[MeSH] OR "retinal"[tiab])
AND ("fundus examination"[MeSH] OR "fundus examination"[tiab] OR "dilated fundus"[tiab])
AND ("imaging"[MeSH] OR "imaging"[tiab] OR "ultra-widefield"[tiab] OR "ultra widefield"[tiab] OR "widefield"[tiab])

**2. Embase**

('sickle cell anemia'/exp OR 'sickle cell':ab,ti OR 'sickle cell disease':ab,ti)
AND ('retinopathy'/exp OR 'retinal disease'/exp OR retinal:ab,ti)
AND ('fundus examination'/exp OR 'dilated fundus':ab,ti)
AND ('imaging'/exp OR imaging:ab,ti OR 'ultra-widefield':ab,ti OR 'ultra widefield':ab,ti OR widefield:ab,ti)

**3. MEDLINE (Ovid)**

exp Sickle Cell Anemia/ OR (sickle cell or sickle cell disease).mp.
AND exp Retinal Diseases/ OR retinopathy.mp. OR retinal.mp.
AND exp Fundus Oculi/ OR (fundus examination or dilated fundus).mp.
AND exp Imaging, Diagnostic/ OR imaging.mp. OR (ultra-widefield or ultra widefield or widefield).mp.

**4. Cochrane Library (CENTRAL)**

([mh "Sickle Cell Anemia"] OR "sickle cell" OR "sickle cell disease")
AND ([mh "Retinal Diseases"] OR retinopathy OR retinal)
AND ("fundus examination" OR "dilated fundus")
AND ([mh "Diagnostic Imaging"] OR imaging OR "ultra-widefield" OR "ultra widefield" OR widefield)
